# Supplementary material for: DPP4/CD26 overexpression in urothelial carcinoma confers an independent prognostic impact and correlates with intrinsic biological aggressiveness
Source: PubMed Central journal article supplement (PMC5356858; doi:10.18632/oncotarget.13820), 2016-12-07
Supplement: oncotarget-08-2995-s001.pdf [file oncotarget-08-2995-s001.pdf]

# DPP4/CD26 overexpression in urothelial carcinoma confers an independent prognostic impact and correlates with intrinsic biological aggressiveness

## Supplementary Materials

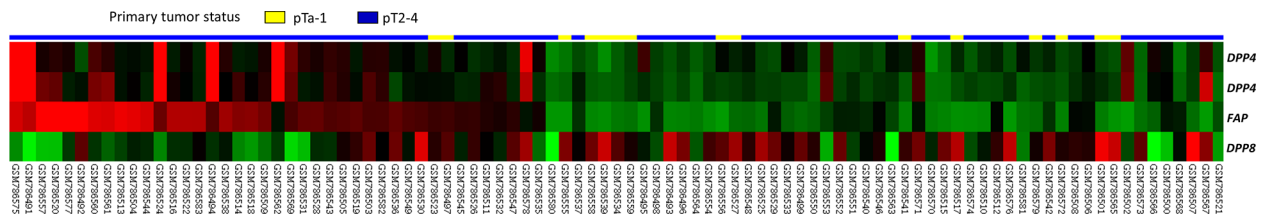

**Supplementary Figure S1: Data mining on GSE31684 (GEO Omnibus) dataset identified three transcripts (4 probes) that were significantly associated with proteolysis (GO: 0006508) in urothelial carcinoma of urinary bladder (UBC). The heat map shows significantly upregulated *DPP4* and *FAP* transcripts levels in muscle-invasive UBC (pT2-pT4,  $n = 73$ ). *DPP8*, on the other hand, is inversely associated with the pT stage. Low expression values are green, progression into dark and reds for higher values.**

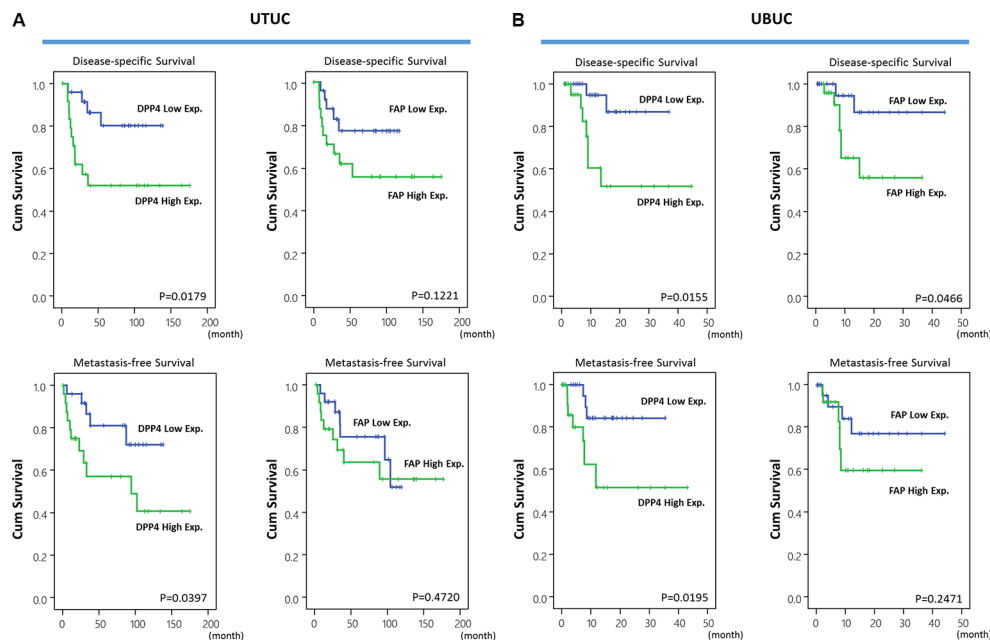

**Supplementary Figure S2: A preliminary test for clinical significance of DPP4 and FAP by using immunohistochemistry in our pilot batch of cases. (A) The expression of DPP4 and FAP proteins were tested in a pilot batch of urothelial carcinoma of the upper urinary tract (UTUC,  $n = 60$ ). The DPP4 immunoreactivity is significantly associated with disease-specific survival (DSS, *right upper panel*) and metastatic-free survival (MeFS, *right lower panel*). On the other hand, FAP expression is not associated with DSS (*left upper panel*) and MeFS (*left lower panel*). (B) The expression of DPP4 and FAP proteins were also tested in a pilot batch of UBUC ( $n = 60$ ). The finding is similar, except FAP expression is significantly associated with DSS of UBUC ( $p = 0.0466$ ).**

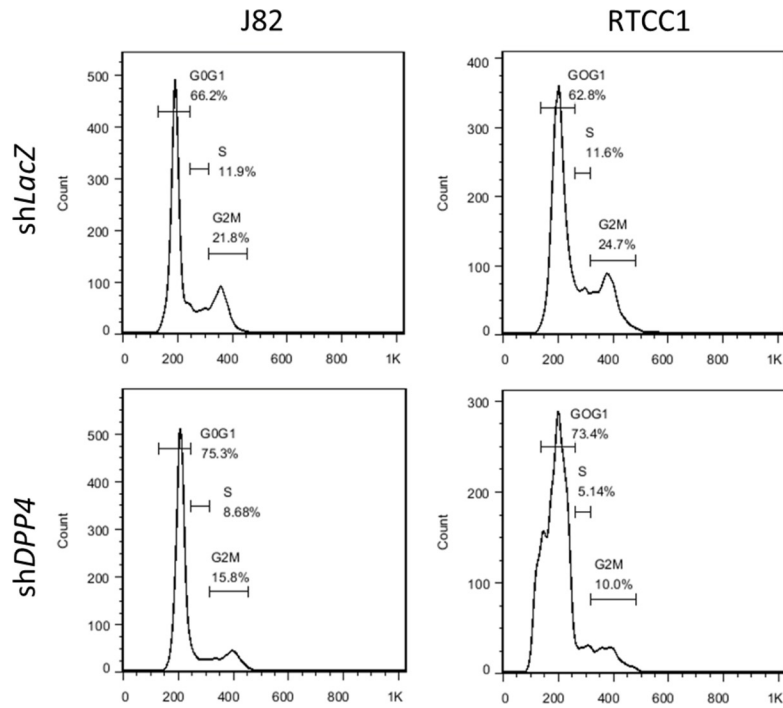

**Supplementary Figure S3: DPP4 knockdown leads to a G0/G1 arrest.** Depletion of DPP4 expression results in a significant G0/G1 accumulation of both J82 (*right panel*) and RTCC-1 (*left panel*) cells.

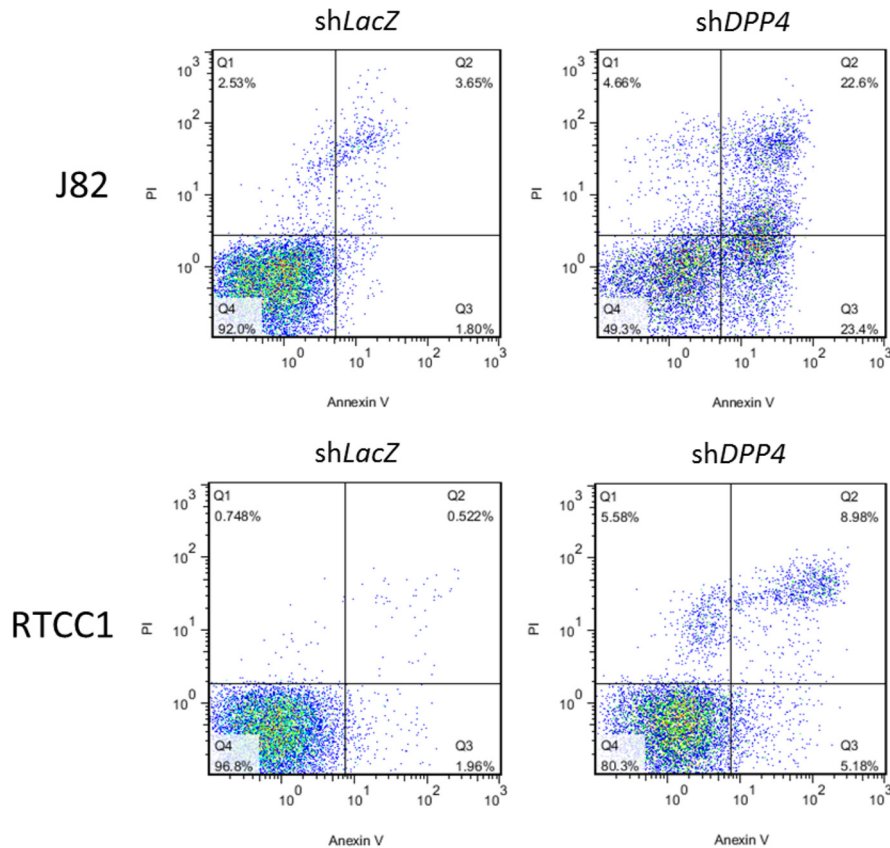

**Supplementary Figure S4: DPP4 knockdown promote apoptosis of UC cell.** Using Annexin V/propidium iodine (PI) stains, the flow cytometric assays demonstrated that J82 and RTCC-1 cell transfected with *shDPP4* have higher amount of apoptotic cells (Annexin V +/PI +), in contrast with the control.

**Supplementary Table S1: Summary of differentially expressed genes associated with *dipeptidyl-peptidase 4* activity and showed stepwise alterations during cancer progression in the transcriptome of urothelial carcinoma of urinary bladder (GSE32894)**

| Probe        | Comparing T2-4 to Ta-T1 |          | Gene Symbol  | Biological Process                                                                                         | Molecular Function                                                                                                                                                 |
|--------------|-------------------------|----------|--------------|------------------------------------------------------------------------------------------------------------|--------------------------------------------------------------------------------------------------------------------------------------------------------------------|
|              | log ratio               | p-value  |              |                                                                                                            |                                                                                                                                                                    |
| ILMN_1689160 | -0.2952                 | 0.0063   | <i>DPEP2</i> | proteolysis                                                                                                | dipeptidase activity, dipeptidyl-peptidase activity, metal ion binding, metalloexopeptidase activity, peptidase activity, zinc ion binding                         |
| ILMN_1692535 | 0.495                   | < 0.0001 | <i>DPP4</i>  | T cell activation, proteolysis, regulation of cell-cell adhesion mediated by integrin, response to hypoxia | aminopeptidase activity, dipeptidyl-peptidase activity, peptidase activity, protein binding, protein homodimerization activity, serine-type endopeptidase activity |
| ILMN_1759801 | -0.2349                 | < 0.0001 | <i>DPP8</i>  | immune response, proteolysis                                                                               | aminopeptidase activity, dipeptidyl-peptidase activity, peptidase activity, serine-type endopeptidase activity                                                     |
| ILMN_2232854 | 0.976                   | < 0.0001 | <i>FAP</i>   | proteolysis                                                                                                | dipeptidyl-peptidase activity, metalloendopeptidase activity, peptidase activity, protein homodimerization activity, serine-type endopeptidase activity            |
| ILMN_2312732 | -0.2454                 | < 0.0001 | <i>DPP8</i>  | immune response, proteolysis                                                                               | aminopeptidase activity, dipeptidyl-peptidase activity, peptidase activity, serine-type endopeptidase activity                                                     |

**Supplementary Table S2: Summary of differentially expressed genes associated with *dipeptidyl-peptidase 4* activity and showed stepwise alterations during cancer progression in the transcriptome of urothelial carcinoma of urinary bladder (GSE31684)**

| Probe       | Comparing T2-4 to Ta-T1 |         | Gene Symbol | Biological Process           | Molecular Function                                                                                                                                                                                                                                                            |
|-------------|-------------------------|---------|-------------|------------------------------|-------------------------------------------------------------------------------------------------------------------------------------------------------------------------------------------------------------------------------------------------------------------------------|
|             | log ratio               | p-value |             |                              |                                                                                                                                                                                                                                                                               |
| 203716_s_at | 0.3656                  | 0.002   | <i>DPP4</i> | immune response, proteolysis | aminopeptidase activity, dipeptidyl-peptidase IV activity, hydrolase activity, peptidase activity, prolyl oligopeptidase activity, serine-type endopeptidase activity, serine-type peptidase activity                                                                         |
| 209955_s_at | 1.5836                  | 0       | <i>FAP</i>  | proteolysis                  | dipeptidyl-peptidase IV activity, hydrolase activity, metalloendopeptidase activity, peptidase activity, prolyl oligopeptidase activity, protein dimerization activity, protein homodimerization activity, serine-type endopeptidase activity, serine-type peptidase activity |
| 211478_s_at | 0.5544                  | 0.0004  | <i>DPP4</i> | immune response, proteolysis | aminopeptidase activity, dipeptidyl-peptidase IV activity, hydrolase activity, peptidase activity, prolyl oligopeptidase activity, serine-type endopeptidase activity, serine-type peptidase activity                                                                         |
| 220939_s_at | -0.5485                 | 0.0021  | <i>DPP8</i> | immune response, proteolysis | aminopeptidase activity, dipeptidyl-peptidase IV activity, dipeptidyl-peptidase activity, hydrolase activity, peptidase activity, serine-type endopeptidase activity, serine-type peptidase activity                                                                          |

**Supplementary Table S3: Correlations between DPP4 and FAP Expression and other important clinicopathological parameters in urothelial carcinomas.**

| Parameter            | Category         | Urothelial Cancer of upper urinary tract |           |      |         |          |      |         | Urothelial cancer of urinary bladder |           |      |         |          |    |         |
|----------------------|------------------|------------------------------------------|-----------|------|---------|----------|------|---------|--------------------------------------|-----------|------|---------|----------|----|---------|
|                      |                  | Case No.                                 | DPP4 Exp. |      | p-value | FAP Exp. |      | p-value | Case No.                             | DPP4 Exp. |      | p-value | FAP Exp. |    | p-value |
|                      |                  |                                          | Low       | High |         | Low      | High |         |                                      | Low       | High |         |          |    |         |
| Primary tumor (T)    | Ta-T1            | 16                                       | 13        | 3    | <0.001* | 12       | 4    | 0.048*  | 12                                   | 11        | 1    | 0.004*  | 10       | 2  | 0.018*  |
|                      | T1               | 9                                        | 7         | 2    |         | 4        | 5    |         | 7                                    | 2         | 5    |         | 4        | 3  |         |
|                      | T2-T4            | 25                                       | 5         | 20   |         | 9        | 16   |         | 31                                   | 12        | 9    |         | 11       | 20 |         |
| Nodal metastasis (N) | Negative (N0)    | 46                                       | 25        | 21   | 0.037*  | 24       | 22   | 0.297   | 43                                   | 23        | 20   | 0.221   | 22       | 21 | 0.684   |
|                      | Positive (N1-N2) | 4                                        | 0         | 4    |         | 1        | 3    |         | 7                                    | 2         | 5    |         | 3        | 4  |         |

\*Statistically significant.

**Supplementary Table S4: Univariate log-rank and multivariate analyses for disease-specific and metastasis-free survivals in upper urinary tract urothelial carcinoma**

| Parameter | Category | Case No. | Urothelial Cancer of upper urinary tract |                 |                          |                 | Urothelial cancer of urinary bladder |                 |                          |                 |
|-----------|----------|----------|------------------------------------------|-----------------|--------------------------|-----------------|--------------------------------------|-----------------|--------------------------|-----------------|
|           |          |          | Disease-specific survival                |                 | Metastasis-free survival |                 | Disease-specific survival            |                 | Metastasis-free survival |                 |
|           |          |          | No. of event                             | <i>p</i> -value | No. of event             | <i>p</i> -value | No. of event                         | <i>p</i> -value | No. of event             | <i>p</i> -value |
| DPP4 Exp. | Low      | 25       | 4                                        | 0.0179*         | 5                        | 0.0397*         | 2                                    | 0.0155*         | 3                        | 0.0195*         |
|           | High     | 25       | 11                                       |                 | 11                       |                 | 7                                    |                 | 8                        |                 |
| FAP Exp.  | Low      | 25       | 5                                        | 0.1221          | 7                        | 0.4720          | 2                                    | 0.0466*         | 4                        | 0.2471          |
|           | High     | 25       | 10                                       |                 | 9                        |                 | 7                                    |                 | 7                        |                 |

\*Statistically significant.

**Supplementary Table S5: Correlations between DPP4 Expression and other important clinicopathological parameters in urothelial carcinomas**

| Parameter                               | Category              | Upper Urinary Tract Urothelial Carcinoma |                 |      |                 | Urinary Bladder Urothelial Carcinoma |                 |      |                 |
|-----------------------------------------|-----------------------|------------------------------------------|-----------------|------|-----------------|--------------------------------------|-----------------|------|-----------------|
|                                         |                       | Case No.                                 | DPP4 Expression |      | <i>p</i> -value | Case No.                             | DPP4 Expression |      | <i>p</i> -value |
|                                         |                       |                                          | Low             | High |                 |                                      | Low             | High |                 |
| Gender                                  | Male                  | 158                                      | 74              | 84   | 0.277           | 216                                  | 104             | 112  | 0.339           |
|                                         | Female                | 182                                      | 96              | 86   |                 | 79                                   | 43              | 36   |                 |
| Age (years)                             | < 65                  | 138                                      | 72              | 66   | 0.508           | 121                                  | 58              | 63   | 0.587           |
|                                         | ≥ 65                  | 202                                      | 98              | 104  |                 | 174                                  | 89              | 85   |                 |
| Tumor location                          | Renal pelvis          | 141                                      | 71              | 70   | 0.110           | -                                    | -               | -    | -               |
|                                         | Ureter                | 150                                      | 81              | 69   |                 | -                                    | -               | -    | -               |
|                                         | Renal pelvis & ureter | 49                                       | 18              | 31   |                 | -                                    | -               | -    | -               |
| Multifocality                           | Single                | 278                                      | 145             | 133  | 0.092           | -                                    | -               | -    | -               |
|                                         | Multifocal            | 62                                       | 25              | 37   |                 | -                                    | -               | -    | -               |
| Primary tumor (T)                       | Ta                    | 89                                       | 62              | 27   | < 0.001*        | 84                                   | 56              | 28   | < 0.001*        |
|                                         | T1                    | 92                                       | 64              | 28   |                 | 88                                   | 50              | 38   |                 |
|                                         | T2-T4                 | 159                                      | 44              | 115  |                 | 123                                  | 41              | 82   |                 |
| Nodal metastasis                        | Negative (N0)         | 312                                      | 165             | 147  | < 0.001*        | 266                                  | 138             | 128  | 0.033*          |
|                                         | Positive (N1-N2)      | 28                                       | 5               | 23   |                 | 29                                   | 9               | 20   |                 |
| Histological grade                      | Low grade             | 56                                       | 36              | 20   | 0.019*          | 56                                   | 33              | 23   | 0.130           |
|                                         | High grade            | 284                                      | 134             | 150  |                 | 239                                  | 114             | 125  |                 |
| Vascular invasion                       | Absent                | 234                                      | 145             | 89   | < 0.001*        | 246                                  | 137             | 109  | < 0.001*        |
|                                         | Present               | 106                                      | 25              | 81   |                 | 49                                   | 10              | 39   |                 |
| Perineural invasion                     | Absent                | 321                                      | 164             | 157  | 0.098           | 275                                  | 142             | 133  | 0.021*          |
|                                         | Present               | 19                                       | 6               | 13   |                 | 20                                   | 5               | 15   |                 |
| Mitotic rate (per 10 high power fields) | < 10                  | 173                                      | 100             | 73   | 0.003*          | 139                                  | 74              | 65   | 0.269           |
|                                         | ≥ 10                  | 167                                      | 70              | 97   |                 | 156                                  | 73              | 83   |                 |

\* Statistically significant.
